# Supplementary material
Source: PubMed Central journal article supplement (PMC2752386)

# Microfabricated Valveless Devices for Thermal Bioreactions based on Diffusion-limited Evaporation

## Supplementary Information

Fang Wang,<sup>†a</sup> Ming Yang,<sup>†a</sup> and Mark A. Burns<sup>\*ab</sup>

<sup>a</sup>Department of Chemical Engineering, University of Michigan, Ann Arbor, MI 48109

<sup>b</sup>Department of Biomedical Engineering, University of Michigan, Ann Arbor, MI 48109

<sup>\*</sup>Email: [maburns@umich.edu](mailto:maburns@umich.edu); Fax: (734) 763 0459; Phone: (734) 764 4315

**Supplementary Figure 1** (a) The heat transfer model of the valveless devices. All three parts (glass, silicon and PCB) are 14mm long and 7mm wide. Both glass and silicon substrates are 500  $\mu\text{m}$  thick, and PCB is 1.5mm thick. The heater is set at a constant heat flux for a given temperature in the reaction chamber (94°C, 55°C and 72°C). The etched region that is 1mm wide is treated as air chamber. The temperature at the bottom surface of the PCB is set at room temperature (23°C). Natural convective heat transfer boundary conditions are applied to all the other surfaces with a heat transfer coefficient of 10  $\text{W}/\text{m}^2\cdot\text{K}$ . (b)-(g) Simulation results of temperature distribution with reaction chamber temperature at 94°C, 72°C, and 55°C. (b)-(d): a long-armed device without thermal isolation; (e)-(g): a long-armed device with thermal isolation. The dash lines show the outer boundaries of the diaphragms.

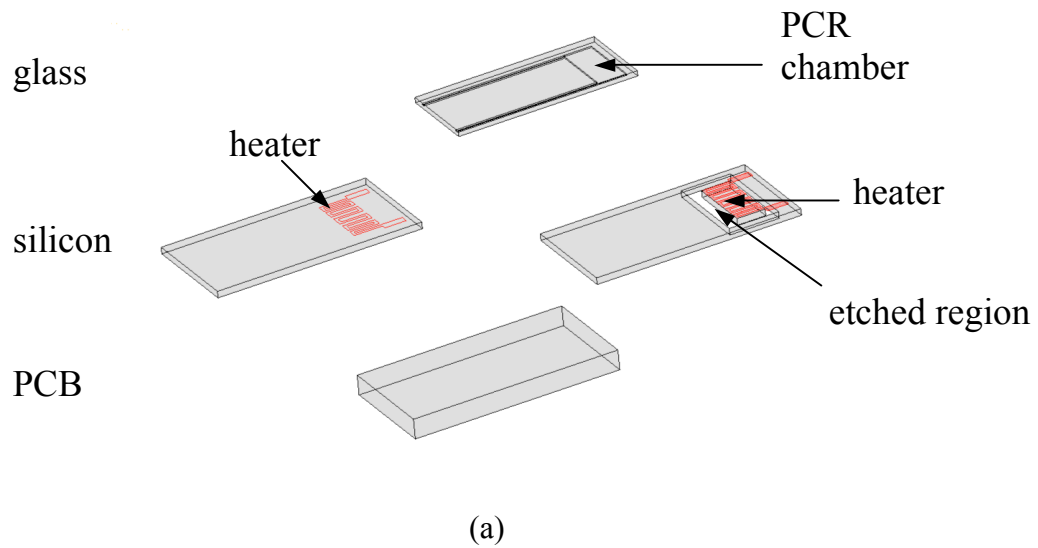

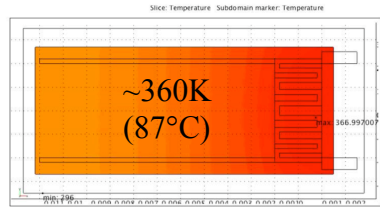

(b)

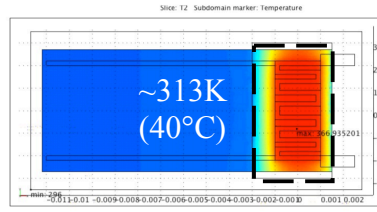

(e)

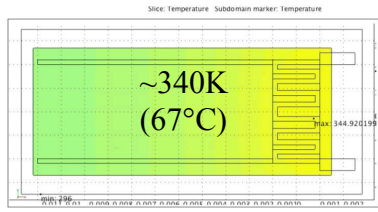

(c)

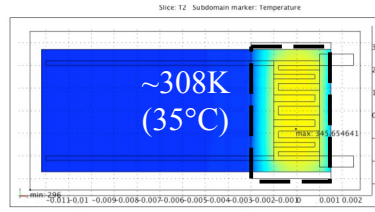

(f)

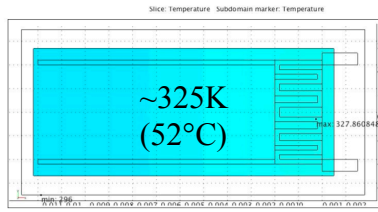

(d)

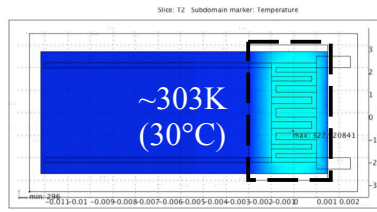

(g)

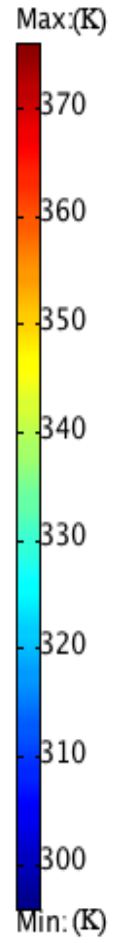

**Supplementary Figure 2** Temperature along the length of the reaction chamber for two designs: chamber on silicon while surrounded by a diaphragm, and chamber directly on a diaphragm.

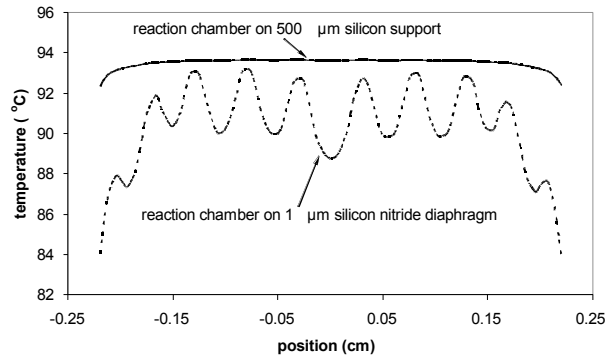

Supplement: NIHMS132656-supplement-Supplementary_1-3.pdf [file NIHMS132656-supplement-Supplementary_1-3.pdf]
